# Supplementary material
Source: publisher site journal article supplement (https://www.dovepress.com/article/343385)
Supplement: Supplementary file 1 [file get_supplementary_file.php]

**Supplementary materials**

**Figure S1** Prediction-corrected visual predictive check plot of the final gentamicin population pharmacokinetic model. The solid lines are 5%, 50%, and 95% quantile lines of the observed concentrations, and the dashed lines are the 5%, 50%, and 95% quantile lines of the predicted concentrations.





**Figure S2** The concentration versus time profiles in CRRT patients receiving 7 mg/kg gentamicin q24h under a 40 mL/kg/h CRRT dose. The solid line represents 50% percentile of the simulated concentrations, and the shaded area displays the 90% concentration prediction intervals for the PK profiles.
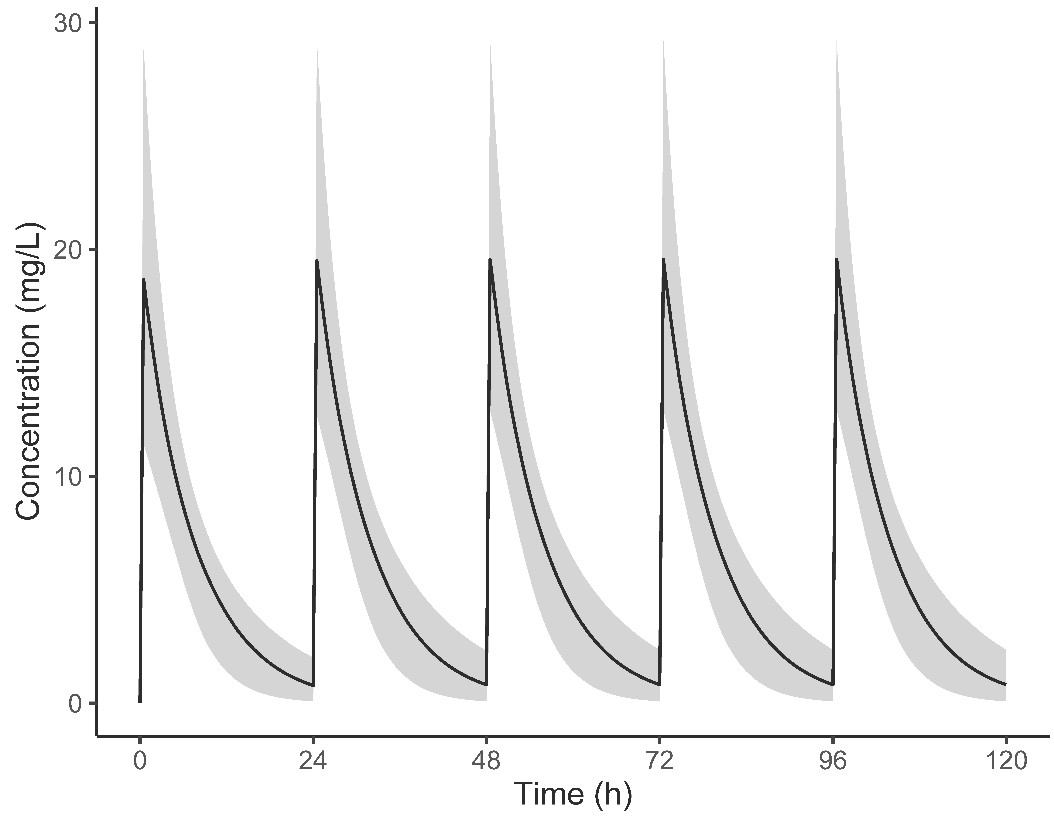


| Dose | AUC/MIC>100  (MIC=1 mg/L) | AUC/MIC>100  (MIC=2mg/L) | Cmax/MIC>10  (MIC=1 mg/L) | Cmax/MIC>10  (MIC=2 mg/L) | Cmin< 1 mg/L | Cmin<2 mg/L |
| --- | --- | --- | --- | --- | --- | --- |
| 3 mg/kg q24h | 1.2% | 0 | 12.4% | 0 | 79.0% | 100% |
| 4 mg/kg q24h | 34.2% | 0 | 49.2% | 0.3% | 60.7% | 98.3% |
| 5 mg/kg q24h | 70.1% | 0 | 78.4% | 2.8% | 47.9% | 89.4% |
| 6 mg/kg q24h | 87.1% | 1.1% | 91.9% | 12.4% | 39.4% | 79.0% |
| 7 mg/kg q24h | 93.9% | 12.5% | 97.5% | 29.5% | 33.1% | 69.2% |

**Table S1** The probability of target attainment (PTA) of PK/PD indices and non-toxicity targets for patients with different gentamicin dose regimens under a CRRT dose of 30 mL/kg/h at the first day.

**Table S2** The probability of target attainment (PTA) of PK/PD indices and non-toxicity targets for patients with different gentamicin dose regimens under a CRRT dose of 40 mL/kg/h at the first day.

| Dose | AUC/MIC>100  (MIC=1mg/L) | AUC/MIC>100  (MIC=2mg/L) | Cmax/MIC>10  (MIC=1 mg/L) | Cmax/MIC>10  (MIC=2 mg/L) | Cmin< 1 mg/L | Cmin<2 mg/L |
| --- | --- | --- | --- | --- | --- | --- |
| 3 mg/kg q24h | 0 | 0 | 10.7% | 0 | 97.5% | 100% |
| 4 mg/kg q24h | 7.1% | 0 | 46.8% | 0.2% | 86.9% | 100% |
| 5 mg/kg q24h | 48.7% | 0 | 77.2% | 2.3% | 75.6% | 99.7% |
| 6 mg/kg q24h | 77.4% | 0 | 91.3% | 10.7% | 65.5% | 97.5% |
| 7 mg/kg q24h | 89.8% | 0.19% | 97.3% | 27.3% | 57.1% | 92.3% |

**Table S3** The probability of target attainment (PTA) of PK/PD indices and non-toxicity targets for patients with different gentamicin dose regimens under a CRRT dose of 50 mL/kg/h at the first day.

| Dose | AUC/MIC>100  (MIC=1mg/L) | AUC/MIC>100  (MIC=2mg/L) | Cmax/MIC > 10  (MIC=1 mg/L) | Cmax/MIC > 10  (MIC=2 mg/L) | Cmin < 1 mg/L | Cmin <2 mg/L |
| --- | --- | --- | --- | --- | --- | --- |
| 3 mg/kg q24h | 0 | 0 | 9.1% | 0 | 99.9% | 100% |
| 4 mg/kg q24h | 0 | 0 | 43.9% | 0.1% | 98.4% | 100% |
| 5 mg/kg q24h | 19.1% | 0 | 75.6% | 1.8% | 93.2% | 100% |
| 6 mg/kg q24h | 60.1% | 0 | 90.7% | 9.1% | 86.8% | 99.9% |
| 7 mg/kg q24h | 82.3% | 0 | 97.1% | 24.8% | 80.6% | 99.5% |
